# Supplementary material for: Brigatinib can inhibit proliferation and induce apoptosis of human immortalized keratinocyte cells
Source: Front Pharmacol. 2025 Feb 18;16:1524277. doi: 10.3389/fphar.2025.1524277 (PMC11876137; doi:10.3389/fphar.2025.1524277)
Supplement: Supplementary file 3 [file Table3.xlsx]

## Sheet: S3
Supplementary Table S3. The results of KEGG analysis in this study
ID	pathway_ID	Pathway	GeneRatio	BgRatio	enrich_factor	pvalue	qvalue	geneID	Symbol
ko04668	hsa04668	TNF signaling pathway	0.0157	0.0125	1.26	0.0948058	0.452199	ENSG00000065559;ENSG00000073756;ENSG00000078401;ENSG00000078747;ENSG00000087470;ENSG00000100324;ENSG00000100906;ENSG00000100985;ENSG00000102871;ENSG00000107175;ENSG00000107643;ENSG00000108691;ENSG00000109339;ENSG00000115966;ENSG00000118260;ENSG00000125347;ENSG00000125538;ENSG00000128342;ENSG00000136244;ENSG00000143578;ENSG00000157625;ENSG00000163734;ENSG00000163739;ENSG00000168040;ENSG00000184371…	MAP2K4;PTGS2;EDN1;ITCH;DNM1L;TAB1;NFKBIA;MMP9;TRADD;CREB3;MAPK8;CCL2;MAPK10;ATF2;CREB1;IRF1;IL1B;LIF;IL6;CREB3L4;TAB3;CXCL3;CXCL1;FADD;CSF1;MAPK11;CHUK;ATF6B;NewGene_2020;NewGene_2021;NewGene_2032
ko04390	hsa04390	Hippo signaling pathway	0.0208	0.0193	1.08	0.325919	0.808871	ENSG00000019549;ENSG00000072803;ENSG00000075711;ENSG00000082701;ENSG00000092969;ENSG00000101665;ENSG00000102981;ENSG00000104899;ENSG00000106366;ENSG00000106799;ENSG00000109321;ENSG00000110092;ENSG00000112576;ENSG00000115266;ENSG00000115738;ENSG00000118971;ENSG00000120162;ENSG00000124171;ENSG00000125378;ENSG00000129474;ENSG00000131899;ENSG00000135925;ENSG00000137713;ENSG00000139926;ENSG00000143514…	SNAI2;FBXW11;DLG1;GSK3B;TGFB2;SMAD7;PARD6A;AMH;SERPINE1;TGFBR1;AREG;CCND1;CCND3;APC2;ID2;CCND2;MOB3B;PARD6B;BMP4;AJUBA;LLGL1;WNT10A;PPP2R1B;FRMD6;TP53BP2;WWC2;WNT7A;PPP2R2B;FZD1;PRKCI;YWHAZ;CTNNB1;YWHAG;MOB1B;FZD4;FZD8;PPP1CC;HSH2D;NewGene_6235;NewGene_7098;NewGene_8659
ko04151	hsa04151	PI3K-Akt signaling pathway	0.0426	0.0409	1.04	0.357544	0.825308	ENSG00000002330;ENSG00000012048;ENSG00000024862;ENSG00000040199;ENSG00000041982;ENSG00000049089;ENSG00000053747;ENSG00000058085;ENSG00000065243;ENSG00000068078;ENSG00000082701;ENSG00000090554;ENSG00000092758;ENSG00000096384;ENSG00000100311;ENSG00000100385;ENSG00000100889;ENSG00000104432;ENSG00000105401;ENSG00000105810;ENSG00000105976;ENSG00000107175;ENSG00000108821;ENSG00000109321;ENSG00000110092…	BAD;BRCA1;CCDC28A;PHLPP2;TNC;COL9A2;LAMA3;LAMC2;PKN2;FGFR3;GSK3B;FLT3LG;COL9A3;HSP90AB1;PDGFB;IL2RB;PCK2;IL7;CDC37;CDK6;MET;CREB3;COL1A1;AREG;CCND1;CCND3;VEGFA;ITGB6;FN1;ATF2;CREB1;FOXO3;CCND2;EREG;ITGB4;CASP9;KRAS;COL4A2;CDK4;MDM2;LAMC1;IL6;CHAD;RPS6;PPP2R1B;THBS1;ITGAV;TP53;EPHA2;MCL1;CREB3L4;EFNA3;OSMR;IL2RG;ITGB1;EIF4E;PPP2R2B;ITGA5;TGFA;ITGA2;YWHAZ;SYK;PPP2R3B;MLST8;IL7R;EFNA1;YWHAG;GNG12;HR…
ko04068	hsa04068	FoxO signaling pathway	0.0167	0.0157	1.07	0.372307	0.825308	ENSG00000092969;ENSG00000100889;ENSG00000101109;ENSG00000106617;ENSG00000106799;ENSG00000107643;ENSG00000109339;ENSG00000110092;ENSG00000116717;ENSG00000118689;ENSG00000118971;ENSG00000121858;ENSG00000125910;ENSG00000126457;ENSG00000131791;ENSG00000133703;ENSG00000134057;ENSG00000135439;ENSG00000135679;ENSG00000136244;ENSG00000145632;ENSG00000147883;ENSG00000152413;ENSG00000157456;ENSG00000168685…	TGFB2;PCK2;STK4;PRKAG2;TGFBR1;MAPK8;MAPK10;CCND1;GADD45A;FOXO3;CCND2;TNFSF10;S1PR4;PRMT1;PRKAB2;KRAS;CCNB1;AGAP2;MDM2;IL6;PLK2;CDKN2B;HOMER1;CCNB2;IL7R;GABARAP;PLK3;HRAS;FOXO4;MAPK11;USP7;NRAS;CHUK
ko04340	hsa04340	Hedgehog signaling pathway	0.0061	0.0058	1.05	0.475522	0.903145	ENSG00000072803;ENSG00000082701;ENSG00000107882;ENSG00000110092;ENSG00000113712;ENSG00000118971;ENSG00000128602;ENSG00000137486;ENSG00000141480;ENSG00000144228;ENSG00000185716;ENSG00000198742	FBXW11;GSK3B;SUFU;CCND1;CSNK1A1;CCND2;SMO;ARRB1;ARRB2;SPOPL;MOSMO;SMURF1
ko04350	hsa04350	TGF-beta signaling pathway	0.0106	0.0103	1.03	0.4786	0.903145	ENSG00000049323;ENSG00000092969;ENSG00000100387;ENSG00000101665;ENSG00000104899;ENSG00000106799;ENSG00000113658;ENSG00000114739;ENSG00000115738;ENSG00000117318;ENSG00000122641;ENSG00000125378;ENSG00000134363;ENSG00000137713;ENSG00000137801;ENSG00000137834;ENSG00000147883;ENSG00000157077;ENSG00000175634;ENSG00000187720;ENSG00000198742	LTBP1;TGFB2;RBX1;SMAD7;AMH;TGFBR1;SMAD5;ACVR2B;ID2;ID3;INHBA;BMP4;FST;PPP2R1B;THBS1;SMAD6;CDKN2B;ZFYVE9;RPS6KB2;THSD4;SMURF1
ko04064	hsa04064	NF-kappa B signaling pathway	0.0122	0.012	1.02	0.504268	0.903145	ENSG00000073756;ENSG00000083799;ENSG00000100065;ENSG00000100324;ENSG00000100906;ENSG00000101266;ENSG00000101966;ENSG00000102871;ENSG00000116717;ENSG00000125538;ENSG00000125735;ENSG00000142867;ENSG00000150455;ENSG00000157625;ENSG00000163734;ENSG00000163739;ENSG00000165025;ENSG00000170458;ENSG00000177595;ENSG00000186197;ENSG00000213341;NewGene_2020;NewGene_2021;NewGene_2032	PTGS2;CYLD;CARD10;TAB1;NFKBIA;CSNK2A1;XIAP;TRADD;GADD45A;IL1B;TNFSF14;BCL10;TIRAP;TAB3;CXCL3;CXCL1;SYK;CD14;PIDD1;EDARADD;CHUK;NewGene_2020;NewGene_2021;NewGene_2032
ko04370	hsa04370	VEGF signaling pathway	0.0076	0.0075	1.01	0.532673	0.903145	ENSG00000002330;ENSG00000073756;ENSG00000112715;ENSG00000132906;ENSG00000133703;ENSG00000169750;ENSG00000174775;ENSG00000176170;ENSG00000182950;ENSG00000185386;ENSG00000213281;ENSG00000275183;NewGene_2020;NewGene_2021;NewGene_2032	BAD;PTGS2;VEGFA;CASP9;KRAS;RAC3;HRAS;SPHK1;ODF3L1;MAPK11;NRAS;LENG9;NewGene_2020;NewGene_2021;NewGene_2032
ko04070	hsa04070	Phosphatidylinositol signaling system	0.0127	0.0127	1	0.542521	0.903145	ENSG00000011405;ENSG00000038210;ENSG00000065357;ENSG00000096433;ENSG00000100330;ENSG00000102780;ENSG00000103502;ENSG00000104331;ENSG00000109452;ENSG00000125814;ENSG00000138193;ENSG00000139505;ENSG00000141401;ENSG00000143398;ENSG00000149091;ENSG00000150995;ENSG00000151151;ENSG00000159082;ENSG00000160014;ENSG00000160256;ENSG00000163624;ENSG00000171100;ENSG00000203965;ENSG00000275183;NewGene_5897	PIK3C2A;PI4K2B;DGKA;ITPR3;MTMR3;DGKH;CDIPT;IMPAD1;INPP4B;NAPB;PLCE1;MTMR6;IMPA2;PIP5K1A;DGKZ;ITPR1;IPMK;SYNJ1;CALM3;FAM207A;CDS1;MTM1;EFCAB7;LENG9;NewGene_5897
ko04010	hsa04010	MAPK signaling pathway	0.0344	0.0347	0.99	0.548974	0.903145	ENSG00000007402;ENSG00000058335;ENSG00000065559;ENSG00000068078;ENSG00000071054;ENSG00000090554;ENSG00000091436;ENSG00000092969;ENSG00000100311;ENSG00000100321;ENSG00000100324;ENSG00000101109;ENSG00000102871;ENSG00000105976;ENSG00000106799;ENSG00000107643;ENSG00000109321;ENSG00000109339;ENSG00000109756;ENSG00000111266;ENSG00000112715;ENSG00000115008;ENSG00000115966;ENSG00000116191;ENSG00000116717…	CACNA2D2;RASGRF1;MAP2K4;FGFR3;MAP4K4;FLT3LG;MAP3K20;TGFB2;PDGFB;SYNGR1;TAB1;STK4;TRADD;MET;TGFBR1;MAPK8;AREG;MAPK10;RAPGEF2;DUSP16;VEGFA;IL1A;ATF2;RALGPS2;GADD45A;DUSP4;EREG;IL1B;TMEM115;DUSP9;KRAS;FLNB;ARRB1;DUSP6;ARRB2;TP53;SAMD1;EPHA2;EFNA3;PAK1;PTPRR;RASA2;ELK4;TAOK1;TGFA;DUSP7;CRK;EFNA1;RAC3;MAP3K2;CD14;GNG12;HRAS;RPS6KA3;CSF1;DUSP8;MAPK11;IL1RAP;FLNA;STMN3;HSPA1B;HSPA1A;NRAS;CHUK;NTF4;EFNA4…
ko04392	hsa04392	Hippo signaling pathway - multiple species	0.0035	0.0036	0.98	0.589473	0.903145	ENSG00000120162;ENSG00000129474;ENSG00000139926;ENSG00000149269;ENSG00000151718;ENSG00000173542;ENSG00000213145	MOB3B;AJUBA;FRMD6;PAK1;WWC2;MOB1B;CRIP1
ko04012	hsa04012	ErbB signaling pathway	0.0101	0.0104	0.97	0.597485	0.903145	ENSG00000002330;ENSG00000065559;ENSG00000082701;ENSG00000107643;ENSG00000109321;ENSG00000109339;ENSG00000110395;ENSG00000124882;ENSG00000133703;ENSG00000141858;ENSG00000143322;ENSG00000149269;ENSG00000157168;ENSG00000163235;ENSG00000167193;ENSG00000174775;ENSG00000175634;ENSG00000182950;ENSG00000213281;ENSG00000275183	BAD;MAP2K4;GSK3B;MAPK8;AREG;MAPK10;CBL;EREG;KRAS;SAMD1;ABL2;PAK1;NRG1;TGFA;CRK;HRAS;RPS6KB2;ODF3L1;NRAS;LENG9
ko04330	hsa04330	Notch signaling pathway	0.0071	0.0075	0.94	0.647084	0.903145	ENSG00000080815;ENSG00000100603;ENSG00000104953;ENSG00000104964;ENSG00000106003;ENSG00000117362;ENSG00000124788;ENSG00000140332;ENSG00000151694;ENSG00000169733;ENSG00000171462;ENSG00000198719;ENSG00000205155;ENSG00000273136	PSEN1;SNW1;TLE6;AES;LFNG;APH1A;ATXN1;TLE3;ADAM17;RFNG;DLK2;DLL1;PSENEN;NBPF26
ko04071	hsa04071	Sphingolipid signaling pathway	0.0122	0.0128	0.95	0.647773	0.903145	ENSG00000015475;ENSG00000065135;ENSG00000087088;ENSG00000090054;ENSG00000090661;ENSG00000100596;ENSG00000102871;ENSG00000107643;ENSG00000109339;ENSG00000117984;ENSG00000125910;ENSG00000133703;ENSG00000135587;ENSG00000137713;ENSG00000141510;ENSG00000156475;ENSG00000164023;ENSG00000167393;ENSG00000169750;ENSG00000174775;ENSG00000176170;ENSG00000180739;ENSG00000185386;ENSG00000213281	BID;GNAI3;BAX;SPTLC1;CERS4;SPTLC2;TRADD;MAPK8;MAPK10;CTSD;S1PR4;KRAS;SMPD2;PPP2R1B;TP53;PPP2R2B;SGMS2;PPP2R3B;RAC3;HRAS;SPHK1;S1PR5;MAPK11;NRAS
ko04391	ko04391	Hippo signaling pathway - fly	0.0005	0.0005	0.98	0.680154	0.903145	ENSG00000213145	CRIP1
ko04152	hsa04152	AMPK signaling pathway	0.0132	0.0145	0.91	0.735358	0.903145	ENSG00000006831;ENSG00000079435;ENSG00000099194;ENSG00000100889;ENSG00000103150;ENSG00000106617;ENSG00000107175;ENSG00000110092;ENSG00000113161;ENSG00000118260;ENSG00000118689;ENSG00000123836;ENSG00000131791;ENSG00000132170;ENSG00000135932;ENSG00000137713;ENSG00000143578;ENSG00000145386;ENSG00000148343;ENSG00000156475;ENSG00000163291;ENSG00000167393;ENSG00000169710;ENSG00000175634;ENSG00000204673…	ADIPOR2;LIPE;SCD;PCK2;MLYCD;PRKAG2;CREB3;CCND1;HMGCR;CREB1;FOXO3;PFKFB2;PRKAB2;PPARG;CAB39;PPP2R1B;CREB3L4;CCNA2;MIGA2;PPP2R2B;PAQR3;PPP2R3B;FASN;RPS6KB2;AKT1S1;ACACA
ko04512	hsa04512	ECM-receptor interaction	0.0122	0.0134	0.91	0.740383	0.903145	ENSG00000041982;ENSG00000049089;ENSG00000053747;ENSG00000058085;ENSG00000092758;ENSG00000108821;ENSG00000115221;ENSG00000115414;ENSG00000128185;ENSG00000132470;ENSG00000134871;ENSG00000135862;ENSG00000136457;ENSG00000137801;ENSG00000138448;ENSG00000138780;ENSG00000150093;ENSG00000161638;ENSG00000164171;ENSG00000177352;ENSG00000187498;ENSG00000196878;NewGene_1066;NewGene_2669	TNC;COL9A2;LAMA3;LAMC2;COL9A3;COL1A1;ITGB6;FN1;DGCR6L;ITGB4;COL4A2;LAMC1;CHAD;THBS1;ITGAV;GSTCD;ITGB1;ITGA5;ITGA2;CCDC71;COL4A1;LAMB3;NewGene_1066;NewGene_2669
ko04150	hsa04150	mTOR signaling pathway	0.0208	0.0225	0.92	0.745293	0.903145	ENSG00000070018;ENSG00000082701;ENSG00000085415;ENSG00000101577;ENSG00000103257;ENSG00000114573;ENSG00000116039;ENSG00000116586;ENSG00000128524;ENSG00000133703;ENSG00000134248;ENSG00000134324;ENSG00000135925;ENSG00000135932;ENSG00000137154;ENSG00000143882;ENSG00000149357;ENSG00000151247;ENSG00000154764;ENSG00000157240;ENSG00000161999;ENSG00000164327;ENSG00000167965;ENSG00000168003;ENSG00000174775…	LRP6;GSK3B;SEH1L;LPIN2;SLC7A5;ATP6V1A;ATP6V1B1;LAMTOR2;ATP6V1F;KRAS;LAMTOR5;LPIN1;WNT10A;CAB39;RPS6;ATP6V1C2;LAMTOR1;EIF4E;WNT7A;FZD1;JMJD8;RICTOR;MLST8;SLC3A2;HRAS;FZD4;RPS6KB2;CRLF3;RPS6KA3;FZD8;PRR5;LAMTOR4;AKT1S1;NRAS;CHUK;FNIP1;CASTOR3;LENG9;NewGene_6235;NewGene_7098;NewGene_8659
ko04310	hsa04310	Wnt signaling pathway	0.0213	0.0237	0.9	0.812716	0.903145	ENSG00000070018;ENSG00000072803;ENSG00000080815;ENSG00000082701;ENSG00000100211;ENSG00000100387;ENSG00000100592;ENSG00000101266;ENSG00000104953;ENSG00000104964;ENSG00000107643;ENSG00000109339;ENSG00000110092;ENSG00000112033;ENSG00000112576;ENSG00000113712;ENSG00000115266;ENSG00000118971;ENSG00000124593;ENSG00000125814;ENSG00000133067;ENSG00000135269;ENSG00000135925;ENSG00000140332;ENSG00000141510…	LRP6;FBXW11;PSEN1;GSK3B;CBY1;RBX1;DAAM1;CSNK2A1;TLE6;AES;MAPK8;MAPK10;CCND1;PPARD;CCND3;CSNK1A1;APC2;CCND2;AL365205.1;NAPB;LGR6;TES;WNT10A;TLE3;TP53;WNT7A;FZD1;FMNL3;RYK;FRAT1;CTNNB1;RAC3;FZD4;FOSL1;FZD8;CTNNBIP1;FRAT2;LGR4;LENG9;NewGene_6235;NewGene_7098;NewGene_8659
ko04371	hsa04371	Apelin signaling pathway	0.0132	0.0154	0.86	0.840956	0.903145	ENSG00000065135;ENSG00000079435;ENSG00000096433;ENSG00000106366;ENSG00000106617;ENSG00000106799;ENSG00000108064;ENSG00000110092;ENSG00000120738;ENSG00000125814;ENSG00000131791;ENSG00000133703;ENSG00000137154;ENSG00000142039;ENSG00000150995;ENSG00000152495;ENSG00000160014;ENSG00000170296;ENSG00000172380;ENSG00000173175;ENSG00000174775;ENSG00000175634;ENSG00000176170;ENSG00000176533;ENSG00000203965…	GNAI3;LIPE;ITPR3;SERPINE1;PRKAG2;TGFBR1;TFAM;CCND1;EGR1;NAPB;PRKAB2;KRAS;RPS6;CCDC97;ITPR1;CAMK4;CALM3;GABARAP;GNG12;ADCY5;HRAS;RPS6KB2;SPHK1;GNG7;EFCAB7;NRAS
ko04013	ko04013	MAPK signaling pathway - fly	0.0005	0.0009	0.55	0.871564	0.903145	ENSG00000160392	C19orf47
ko04061	hsa04061	Viral protein interaction with cytokine and cytokine receptor	0.0081	0.0103	0.79	0.891122	0.903145	ENSG00000100385;ENSG00000104689;ENSG00000108691;ENSG00000120889;ENSG00000121858;ENSG00000125735;ENSG00000136244;ENSG00000142677;ENSG00000147168;ENSG00000151882;ENSG00000157873;ENSG00000162892;ENSG00000163734;ENSG00000163739;ENSG00000173535;ENSG00000184371	IL2RB;TNFRSF10A;CCL2;TNFRSF10B;TNFSF10;TNFSF14;IL6;IL22RA1;IL2RG;CCL28;TNFRSF14;IL24;CXCL3;CXCL1;TNFRSF10C;CSF1
ko04514	hsa04514	Cell adhesion molecules	0.0157	0.0188	0.84	0.891661	0.903145	ENSG00000010704;ENSG00000018236;ENSG00000073008;ENSG00000076662;ENSG00000107738;ENSG00000110876;ENSG00000113946;ENSG00000120217;ENSG00000134258;ENSG00000138448;ENSG00000149573;ENSG00000150093;ENSG00000160588;ENSG00000169896;ENSG00000170558;ENSG00000179344;ENSG00000179776;ENSG00000196126;ENSG00000197822;ENSG00000198502;ENSG00000204257;ENSG00000204287;ENSG00000204525;ENSG00000204642;ENSG00000206503…	HFE;CNTN1;PVR;ICAM3;VSIR;SELPLG;CLDN16;CD274;VTCN1;ITGAV;MPZL2;ITGB1;MPZL3;ITGAM;CDH2;HLA-DQB1;CDH5;HLA-DRB1;OCLN;HLA-DRB5;HLA-DMA;HLA-DRA;HLA-C;HLA-F;HLA-A;HLA-DPB1;HLA-DPA1;HLA-B;HLA-DQA2;HLA-DMB;FP565260.3
ko04066	hsa04066	HIF-1 signaling pathway	0.0091	0.0126	0.72	0.95661	0.903145	ENSG00000072274;ENSG00000078401;ENSG00000100292;ENSG00000102265;ENSG00000103363;ENSG00000106366;ENSG00000108515;ENSG00000109107;ENSG00000111640;ENSG00000112715;ENSG00000134333;ENSG00000136244;ENSG00000137154;ENSG00000151116;ENSG00000151247;ENSG00000152256;ENSG00000159399;ENSG00000175634	TFRC;EDN1;HMOX1;TIMP1;ELOB;SERPINE1;ENO3;ALDOC;GAPDH;VEGFA;LDHA;IL6;RPS6;UEVLD;EIF4E;PDK1;HK2;RPS6KB2
ko04014	hsa04014	Ras signaling pathway	0.0218	0.0272	0.8	0.960434	0.903145	ENSG00000002330;ENSG00000058335;ENSG00000068078;ENSG00000075399;ENSG00000090554;ENSG00000100311;ENSG00000101109;ENSG00000105976;ENSG00000107643;ENSG00000108774;ENSG00000109339;ENSG00000112685;ENSG00000112715;ENSG00000133328;ENSG00000133703;ENSG00000134954;ENSG00000138193;ENSG00000142627;ENSG00000143322;ENSG00000143590;ENSG00000144118;ENSG00000148680;ENSG00000149269;ENSG00000155903;ENSG00000156299…	BAD;RASGRF1;FGFR3;VPS9D1;FLT3LG;PDGFB;STK4;MET;MAPK8;RAB5C;MAPK10;EXOC2;VEGFA;HRASLS2;KRAS;ETS1;PLCE1;EPHA2;ABL2;EFNA3;RALB;HTR7;PAK1;RASA2;TIAM1;REL;TGFA;EFNA1;RAC3;GNG12;HRAS;PLA2G16;GNG7;PTPN11;CSF1;FOXO4;EFCAB7;NRAS;CHUK;NTF4;EFNA4;AC008687.8;NewGene_7018
ko04630	hsa04630	JAK-STAT signaling pathway	0.0137	0.0185	0.74	0.97271	0.903145	ENSG00000095752;ENSG00000100311;ENSG00000100385;ENSG00000103522;ENSG00000104432;ENSG00000110092;ENSG00000111679;ENSG00000112576;ENSG00000118971;ENSG00000120833;ENSG00000128342;ENSG00000136244;ENSG00000142677;ENSG00000143384;ENSG00000145623;ENSG00000147168;ENSG00000150281;ENSG00000162892;ENSG00000168685;ENSG00000172458;ENSG00000174775;ENSG00000179295;ENSG00000180008;ENSG00000205765;ENSG00000213928…	IL11;PDGFB;IL2RB;IL21R;IL7;CCND1;PTPN6;CCND3;CCND2;SOCS2;LIF;IL6;IL22RA1;MCL1;OSMR;IL2RG;CTF1;IL24;IL7R;IL17D;HRAS;PTPN11;SOCS4;C5orf51;IRF9;SOCS7;NewGene_7018
ko04015	hsa04015	Rap1 signaling pathway	0.0177	0.0239	0.74	0.983842	0.903145	ENSG00000065135;ENSG00000068078;ENSG00000079337;ENSG00000100311;ENSG00000102981;ENSG00000105976;ENSG00000108518;ENSG00000109756;ENSG00000112715;ENSG00000124171;ENSG00000133703;ENSG00000137801;ENSG00000138193;ENSG00000142627;ENSG00000143590;ENSG00000144118;ENSG00000150093;ENSG00000156299;ENSG00000158987;ENSG00000160293;ENSG00000163558;ENSG00000167193;ENSG00000168036;ENSG00000169242;ENSG00000169750…	GNAI3;FGFR3;RAPGEF3;PDGFB;PARD6A;MET;PFN1;RAPGEF2;VEGFA;PARD6B;KRAS;THBS1;PLCE1;EPHA2;EFNA3;RALB;ITGB1;TIAM1;RAPGEF6;VAV2;PRKCI;CRK;CTNNB1;EFNA1;RAC3;ITGAM;ADCY5;HRAS;CSF1;MAPK11;HSH2D;CTNND1;EFCAB7;NRAS;EFNA4
ko04072	hsa04072	Phospholipase D signaling pathway	0.0111	0.0173	0.64	0.995028	0.903145	ENSG00000008256;ENSG00000026652;ENSG00000065357;ENSG00000079337;ENSG00000100311;ENSG00000102780;ENSG00000108669;ENSG00000133703;ENSG00000141934;ENSG00000143398;ENSG00000144118;ENSG00000149091;ENSG00000155189;ENSG00000165025;ENSG00000169692;ENSG00000173175;ENSG00000174775;ENSG00000175213;ENSG00000176170;ENSG00000179295;ENSG00000213281;NewGene_7018	CYTH3;AGPAT4;DGKA;RAPGEF3;PDGFB;DGKH;CYTH1;KRAS;PLPP2;PIP5K1A;RALB;DGKZ;AGPAT5;SYK;AGPAT2;ADCY5;HRAS;ZNF408;SPHK1;PTPN11;NRAS;NewGene_7018
ko04024	hsa04024	cAMP signaling pathway	0.0152	0.0232	0.65	0.997918	0.903145	ENSG00000002330;ENSG00000024862;ENSG00000058668;ENSG00000065135;ENSG00000078401;ENSG00000079337;ENSG00000079435;ENSG00000100906;ENSG00000104899;ENSG00000107175;ENSG00000107643;ENSG00000109339;ENSG00000118260;ENSG00000125257;ENSG00000125398;ENSG00000127129;ENSG00000138193;ENSG00000143578;ENSG00000149269;ENSG00000152495;ENSG00000156299;ENSG00000160293;ENSG00000169750;ENSG00000173175;ENSG00000174437…	BAD;CCDC28A;ATP2B4;GNAI3;EDN1;RAPGEF3;LIPE;NFKBIA;AMH;CREB3;MAPK8;MAPK10;CREB1;ABCC4;SOX9;EDN2;PLCE1;CREB3L4;PAK1;CAMK4;TIAM1;VAV2;RAC3;ADCY5;ATP2A2;HTR1D;HCAR2;PPP1CC;EFCAB7;GABBR1
ko04060	hsa04060	Cytokine-cytokine receptor interaction	0.0218	0.0323	0.67	0.999234	0.903145	ENSG00000049249;ENSG00000092969;ENSG00000095752;ENSG00000100385;ENSG00000103522;ENSG00000104432;ENSG00000104689;ENSG00000104899;ENSG00000106799;ENSG00000108691;ENSG00000114739;ENSG00000115008;ENSG00000120889;ENSG00000121858;ENSG00000122641;ENSG00000125378;ENSG00000125538;ENSG00000125657;ENSG00000125726;ENSG00000125735;ENSG00000128342;ENSG00000130513;ENSG00000133401;ENSG00000136244;ENSG00000142677…	TNFRSF9;TGFB2;IL11;IL2RB;IL21R;IL7;TNFRSF10A;AMH;TGFBR1;CCL2;ACVR2B;IL1A;TNFRSF10B;TNFSF10;INHBA;BMP4;IL1B;TNFSF9;CD70;TNFSF14;LIF;GDF15;PDZD2;IL6;IL22RA1;OSMR;IL2RG;CTF1;CCL28;TNFRSF14;IL24;IL17RE;IL17RC;CXCL3;CXCL1;IL7R;JAGN1;IL17D;TNFRSF10C;CSF1;IL1RAP;C5orf51;TNFRSF25
ko02010	hsa02010	ABC transporters	0.001	0.0055	0.19	0.99992	0.903145	ENSG00000108846;ENSG00000125257	ABCC3;ABCC4
ko04020	hsa04020	Calcium signaling pathway	0.0132	0.0251	0.52	0.999984	0.903145	ENSG00000008118;ENSG00000024862;ENSG00000058668;ENSG00000096433;ENSG00000099957;ENSG00000100311;ENSG00000102893;ENSG00000125814;ENSG00000135124;ENSG00000138193;ENSG00000142039;ENSG00000148343;ENSG00000148680;ENSG00000150995;ENSG00000151729;ENSG00000152495;ENSG00000156026;ENSG00000160014;ENSG00000160256;ENSG00000174437;ENSG00000176170;ENSG00000203965;ENSG00000257950;ENSG00000275183;NewGene_1091;Ne…	CAMK1G;CCDC28A;ATP2B4;ITPR3;P2RX6;PDGFB;PHKB;NAPB;P2RX4;PLCE1;CCDC97;MIGA2;HTR7;ITPR1;SLC25A4;CAMK4;MCU;CALM3;FAM207A;ATP2A2;SPHK1;EFCAB7;P2RX5-TAX1BP3;LENG9;NewGene_1091;NewGene_8003
ko04022	hsa04022	cGMP-PKG signaling pathway	0.0086	0.0191	0.45	0.99999	0.903145	ENSG00000002330;ENSG00000058668;ENSG00000065135;ENSG00000096433;ENSG00000107175;ENSG00000115966;ENSG00000118260;ENSG00000120937;ENSG00000143578;ENSG00000148343;ENSG00000150995;ENSG00000151729;ENSG00000173175;ENSG00000174437;ENSG00000186298;ENSG00000203965;ENSG00000213676	BAD;ATP2B4;GNAI3;ITPR3;CREB3;ATF2;CREB1;NPPB;CREB3L4;MIGA2;ITPR1;SLC25A4;ADCY5;ATP2A2;PPP1CC;EFCAB7;ATF6B
ko04080	hsa04080	Neuroactive ligand-receptor interaction	0.0127	0.0396	0.32	1	0.903145	ENSG00000024862;ENSG00000078401;ENSG00000099957;ENSG00000100300;ENSG00000102287;ENSG00000125730;ENSG00000125910;ENSG00000126351;ENSG00000127129;ENSG00000135124;ENSG00000147437;ENSG00000148343;ENSG00000148680;ENSG00000163794;ENSG00000164251;ENSG00000171631;ENSG00000175213;ENSG00000175591;ENSG00000179546;ENSG00000180739;ENSG00000204681;ENSG00000205765;ENSG00000257950;NewGene_1091;NewGene_8521	CCDC28A;EDN1;P2RX6;TSPO;GABRE;C3;S1PR4;THRA;EDN2;P2RX4;GNRH1;MIGA2;HTR7;UCN;F2RL1;P2RY6;ZNF408;P2RY2;HTR1D;S1PR5;GABBR1;C5orf51;P2RX5-TAX1BP3;NewGene_1091;NewGene_8521
